# Supplementary material
Source: HighWire-hosted journal article supplement (https://hw-f5-jim.highwire.org/content/69/1/47)

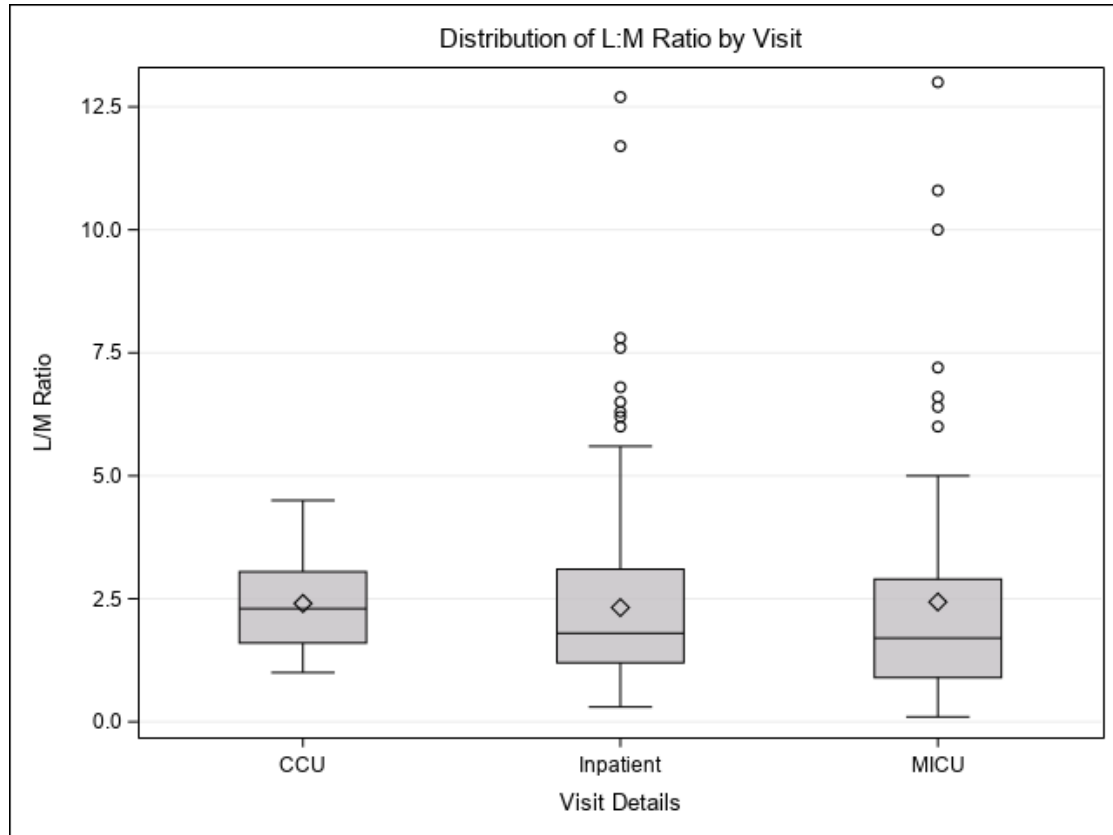

**Supplementary Material Figure 1:** The medians of L:M ratio were equal across visit details ( $p=0.2266$ ).

Supplement: inline-supplementary-material-1 [file inline-supplementary-material-1.pdf]
